# Supplementary material for: Transcriptional and Mutational Profiling of B-Other Acute Lymphoblastic Leukemia for Improved Diagnostics
Source: MDPI journal article supplement (doi:10.3390/cancers13225653), 2021-11-12
Supplement: s1 [file s1]

## SUPPLEMENTARY FIGURES

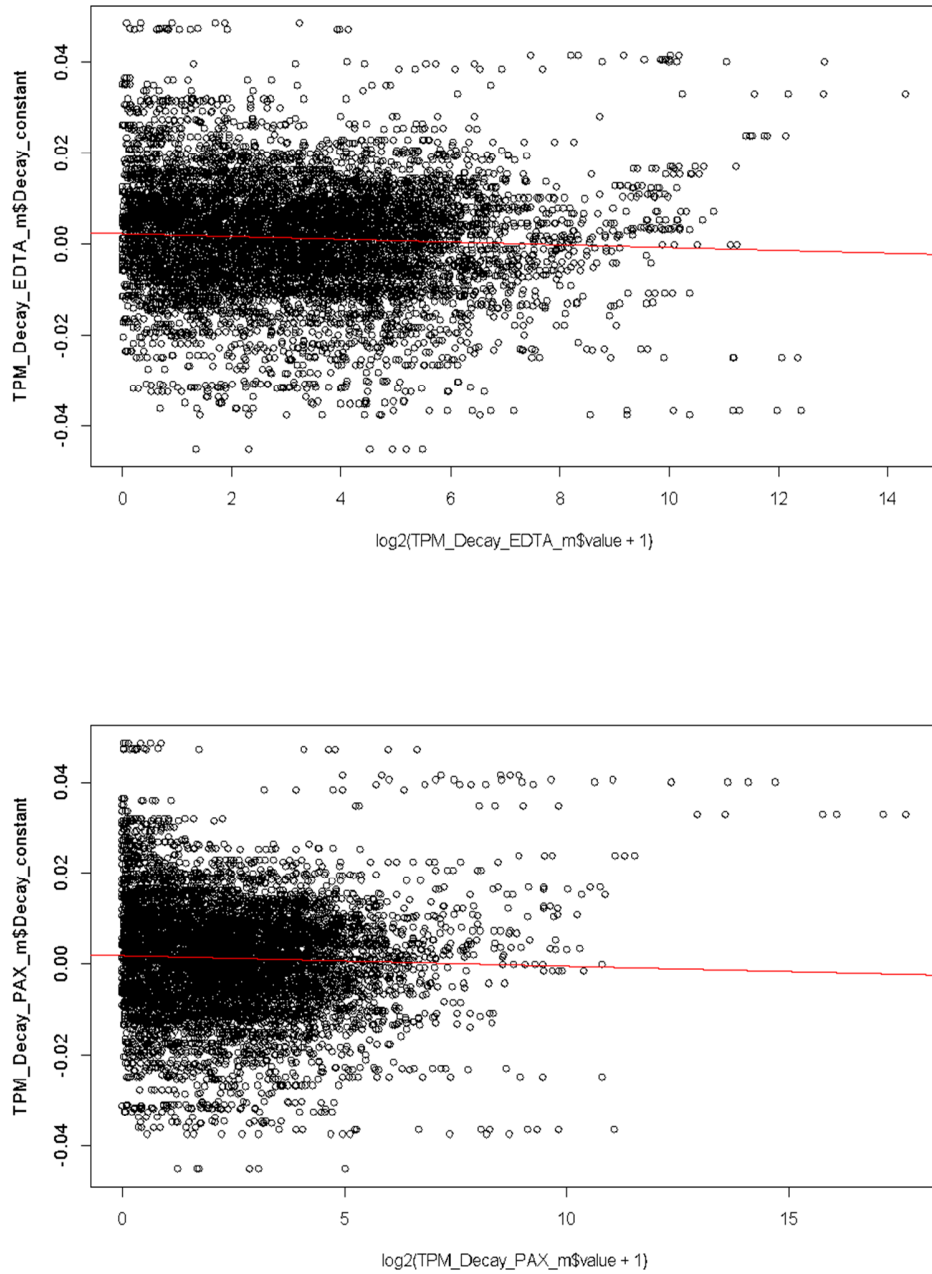

**Figure S2.** No appreciable correlation between expression (TPM) and decay constant exists in either EDTA or PAXgene samples.

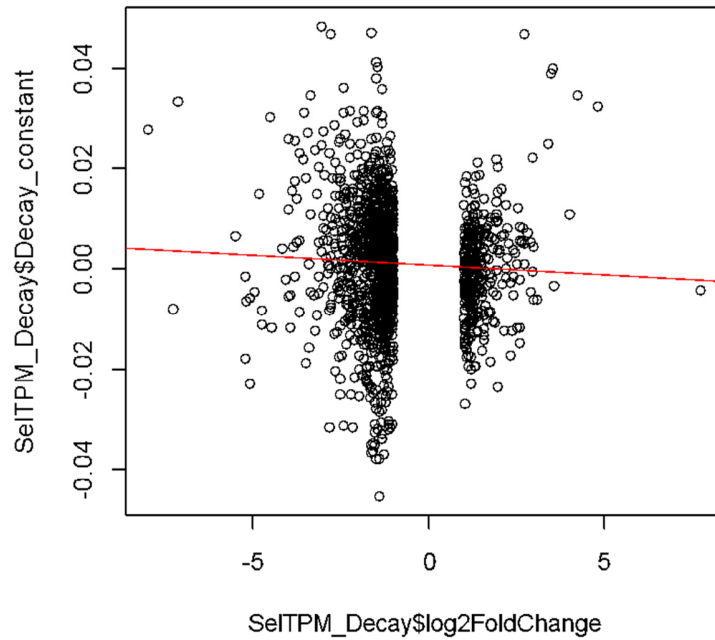

**Figure S3. Slow degrading DEGs are not overrepresented in genes upregulated in the EDTA samples.**

On the left side are genes with higher relative abundance in EDTA. The gap shows exclusion of DEGs with  $|L2FC| \leq 1$ . On the right side are the genes with higher relative abundance in PAXgene. DEGs above 0 on the Y axis are degrading faster than the ones below 0. From this representation, we can reject the hypothesis that slow decaying DEGs dominate the upregulated genes in EDTA.
